# Supplementary material for: Comparison of endotracheal aspirate and bronchoalveolar lavage fluid metagenomic next-generation sequencing in severe pneumonia: a nested, matched case-control study
Source: Research Square preprint supplement (doi:10.21203/rs.3.rs-1588663/v1), 2022-07-29
Supplement: Supplementary file 1 [file 2074c76708736e503f9c2a2f.docx]

Supplementary Table 2. The reliability of potential pathogens in each patient

|  | ETA (n=53) | | | BALF (n=106) | | | |
| --- | --- | --- | --- | --- | --- | --- | --- |
|  | Confirmed (n) | Probable (n) | Possible (n) | Confirmed(n) | Probable (n) | | Possible (n) |
| **Bacteria** |  |  |  |  |  |  | |
| *Acinetobacter baumannii* | 0 | 1 | 5 | 0 | 4 | 1 | |
| *Klebsiella pneumoniae* | 1 | 3 | 3 | 4 | 1 | 1 | |
| *Corynebacterium striata* | 0 | 0 | 9 | 0 | 5 | 20 | |
| *Staphylococcus aureus* | 0 | 1 | 1 | 0 | 1 | 0 | |
| *Pseudomonas aeruginosa* | 0 | 1 | 0 | 0 | 0 | 0 | |
| *Stenotrophomonas maltophilia* | 1 | 2 | 1 | 2 | 8 | 2 | |
| *Burkholderia neocepacia* | 0 | 2 | 1 | 2 | 5 | 1 | |
| *Enterococcus faecium* | 1 | 3 | 2 | 3 | 10 | 3 | |
| *Streptococcus pneumoniae* | 1 | 1 | 1 | 6 | 1 | 0 | |
| *Haemophilus parainfluenzae* | 1 | 0 | 0 | 1 | 0 | 0 | |
| *Staphylococcus epidermidis* | 0 | 2 | 2 | 2 | 3 | 1 | |
| *Streptococcus sanguis* | 0 | 0 | 0 | 1 | 4 | 2 | |
| *Escherichia Coli* | 0 | 0 | 0 | 1 | 1 | 0 | |
| *Nocardia dermatophyte* | 1 | 0 | 0 | 0 | 0 | 0 | |
| *Enterobacter cloacae* | 0 | 1 | 0 | 0 | 0 | 0 | |
| *Chlamydia psittaci* | 1 | 0 | 0 | 2 | 0 | 0 | |
| **Fungi** |  |  |  |  |  |  | |
| *Aspergillus* | 2 | 2 | 1 | 7 | 3 | 1 | |
| *Pneumocystis* | 1 | 0 | 0 | 2 | 0 | 0 | |
| *Rhizopus* | 2 | 2 | 2 | 7 | 2 | 0 | |
| *Saccharomyces* | 0 | 0 | 1 | 0 | 0 | 3 | |
| *Cryptococcus* | 0 | 0 | 0 | 1 | 0 | 0 | |
| **Virus** |  |  |  |  |  |  | |
| CMV | 0 | 0 | 0 | 1 | 3 | 0 | |
| EBV | 0 | 1 | 0 | 0 | 2 | 1 | |
| HSV-1 | 0 | 0 | 1 | 0 | 2 | 1 | |
| HAdV | 0 | 0 | 0 | 0 | 0 | 1 | |
| WUV | 0 | 1 | 0 | 0 | 0 | 0 | |

Abbreviations: ETA, endotracheal aspirates; BALF, bronchoalveolar lavage fluid; CMV, Cytomegalovirus; EBV, Epstein-Barr virus; HSV-1, Herpes simplex virus type 1; HAdV, Human adenovirus; WUV, WU polyoma virus.
