# Supplementary material for: Comparison of endotracheal aspirate and bronchoalveolar lavage fluid metagenomic next-generation sequencing in severe pneumonia: a nested, matched case-control study
Source: Research Square preprint supplement (doi:10.21203/rs.3.rs-1588663/v1), 2022-07-29
Supplement: Supplementary file 2 [file ea7aa7a1e3c0f92ca5dd16d3.docx]

Supplementary Table 1. Potential pathogens identified by paired ETA and BALF mNGS.

| ID | ETA | | | | BALF | | | | consistent |
| --- | --- | --- | --- | --- | --- | --- | --- | --- | --- |
| bacteria | Fungi | | Virus | | bacteria | Fungi | Virus |
| 10 | *S. pneumoniae* | |  |  | *S. pneumoniae* | |  |  | complete |
| 12 | 1. *baumannii*   *S. aureus* | |  |  | *A. baumannii* | |  |  | partial |
| 18 | 1. *baumannii* | |  |  | 1. *baumannii* | |  |  | complete |
| 25 | *P. aeruginosa*  *K. pneumoniae* | |  |  | *K. pneumoniae* | |  |  | partial |
| 30 | 1. *striata* | |  | CMV | 1. *baumannii* | |  | CMV | partial |
| 34 | *A. baumannii* | |  |  | *A. baumannii* | |  |  | complete |
| 39 | 1. *neocepacia* 2. *baumannii* | |  |  | *B. neocepacia* | | *Pneumocystis* |  | partial |
| 40 | *P. aeruginosa* | |  |  | *P. aeruginosa* | |  |  | complete |
| 42 | *C. striata* | |  | EBV | *C. striata* | |  | EBV | complete |
| 44 | *E. faecium* | |  |  | *E.faecium* | | *Aspergillus*  *Pneumocystis* |  | partial |
| 45 | *None* | |  |  | *H. parainfluenzae* | |  |  | inconsistent |
| 47 | 1. *pneumoniae*   *C. striata* | |  |  | *K. pneumoniae* | |  |  | partial |
| 50 | 1. *baumannii* | |  |  | 1. *maltophilia* | |  |  | inconsistent |
| 79 | 1. *Baumannii* 2. *neocepacia* | |  |  | *K. pneumoniae*  *A. baumannii* | |  |  | partial |
| 91 | *P. aeruginosa* | | *Aspergillus* |  | *P. aeruginosa* | |  |  | partial |
| 105 | *C. striata* | |  |  | *C. striata* | | *Aspergillus* |  | partial |
| 111 | 1. *aeruginosa* | | *Pneumocystis* |  |  | | *Pneumocystis* |  | partial |
| 154 | *C.  psittaci* | |  |  | *C.  psittaci* | |  |  | complete |

Abbreviations: ETA, endotracheal aspirates; BALF, bronchoalveolar lavage fluid; CMV, Cytomegalovirus; EBV, Epstein-Barr virus.
